# Supplementary material for: Design and Selection of Novel C1s Inhibitors by In Silico and In Vitro Approaches
Source: PubMed Central journal article supplement (PMC6832932; doi:10.3390/molecules24203641), 2019-10-09
Supplement: molecules-24-03641-s001.pdf [file molecules-24-03641-s001.pdf]

## SUPPLEMENTARY MATERIAL

Table S1a. Seed compounds for 2D similarity search (part 1.)

| CdId | Structure                                                                                     | Mol Weight | Formula     | PUBCHEM_SID | LogP | IC50 (micro M) |
|------|-----------------------------------------------------------------------------------------------|------------|-------------|-------------|------|----------------|
| 1    | 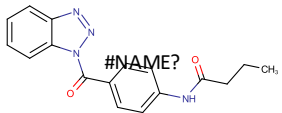<br>#NAME?   | 308.341    | C17H16N4O2  | 4 258 988   | 2.86 | 0.38           |
| 2    | <br>#NAME?   | 267.244    | C14H9N3O3   | 7 977 382   | 2.1  | 0.85           |
| 3    | <br>#NAME?  | 291.34     | C12H9N3O2S2 | 4,257,399   | 3.56 | 0.88           |
| 4    | <br>#NAME? | 299.35     | C15H13N3O2S | 7 965 333   | 4.15 | 0.9            |
| 5    | <br>#NAME? | 255.277    | C14H13N3O2  | 3 717 586   | 2.06 | 2.14           |

Table S1b. Pubchem seed compounds for 2D similarity search (part 2.)

| CdId | Structure                                                                           | Mol Weight | Formula          | PUBCHEM_SID | LogP | IC50 (micro M) |
|------|-------------------------------------------------------------------------------------|------------|------------------|-------------|------|----------------|
| 6    | 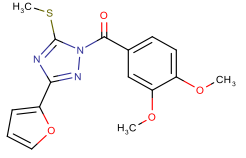   | 345.37     | C16H15N3O4S      | 4 255 157   | 3.25 | 2.37           |
| 7    |    | 232.3      | C12H12N2OS       | 4 260 000   | 2.82 | 3.83           |
| 8    |   | 305.293    | C17H11N3O3       | 857 178     | 2.71 | 4.26           |
| 9    |  | 275.28     | C12H9N3O3S       | 7 965 558   | 2.7  | 4.48           |
| 10   |  | 213.192    | C12H7NO3         | 7 973 318   | 2.42 | 4.62           |
| 11   |  | 282.343    | C17H18N2O2       | 4 263 151   | 2.24 | 5.35           |
| 12   |  | 332.157    | C14H10BrN3O<br>2 | 4 263 449   | 3.09 | 5.59           |

Table S2. Biological results of all purchased compounds (2D selection)

to be added

Table S3. Biological results of all purchased compounds (pharmacophore selection)

to be added

Table S4. Biological results of all purchased compounds (hit validation)

to be added

Figure S1. Selected concentration dependency curves (for C1s, Factor Xa)

Samples: C1s: FUT-175 (reference); #1, #9, #11, #2, #10, #15, #13, #3, #21, #18, #22, #17, #14, Factor Xa: Edoxaban, #9, #3, #22.

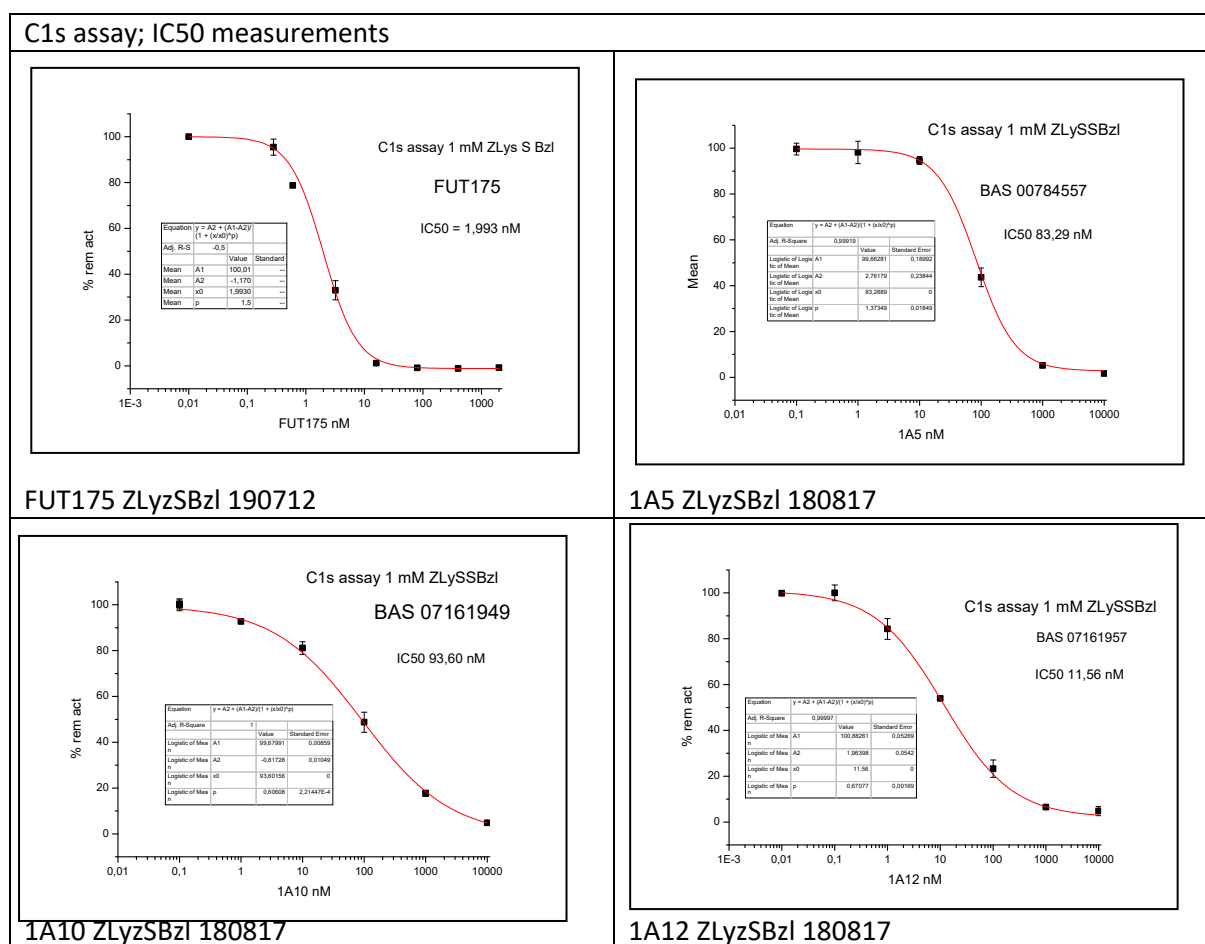

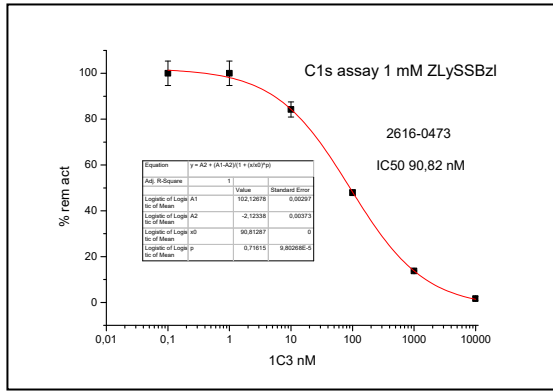

1C3 ZLyzSBzl 180817

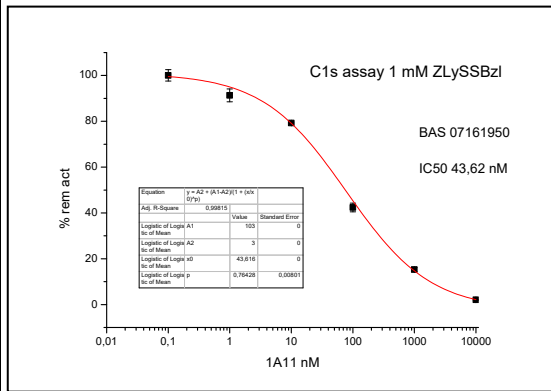

1A11 ZLyzSBzl 180817

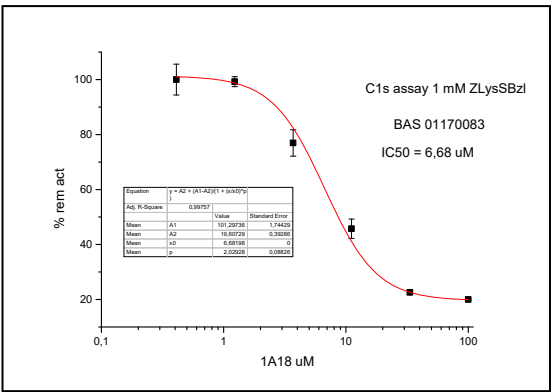

1A18 ZLysSBzl 180829

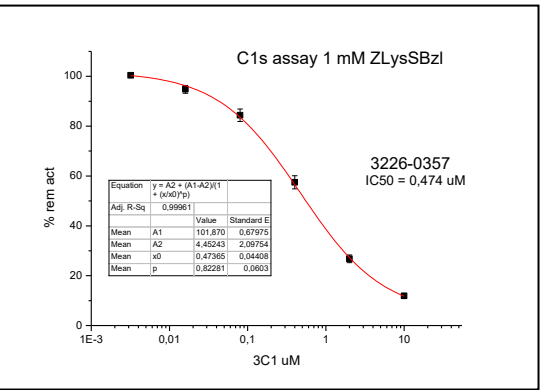

3C1 ZLysSBzl 190807

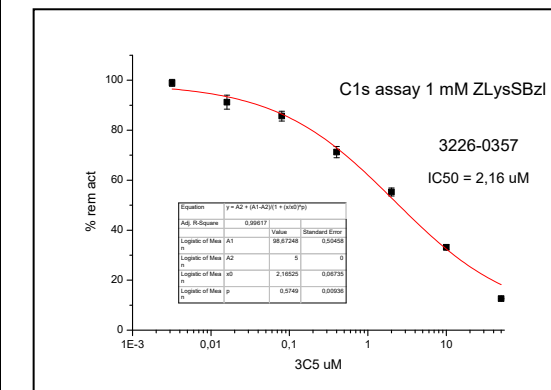

3C5 Z LysSBzl 190807

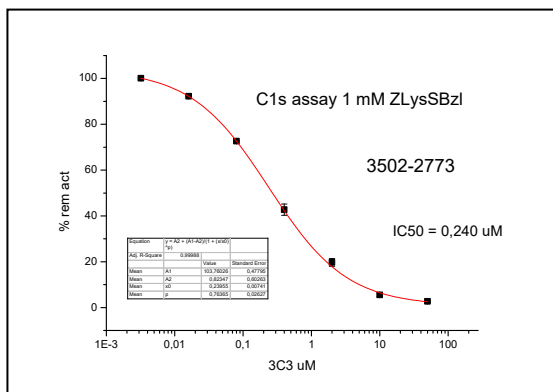

3C3 ZLyzSBzl 190807

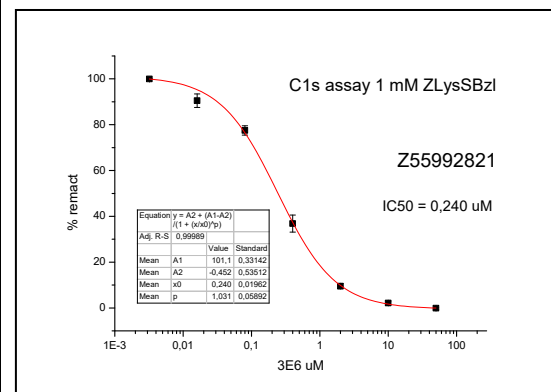

3E6 ZLyzSBzl 190808

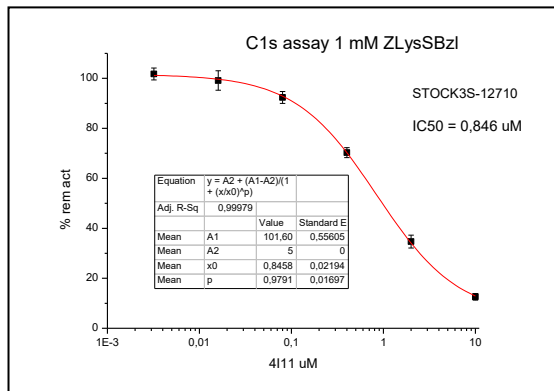

4I II Z LysSBzl 190807

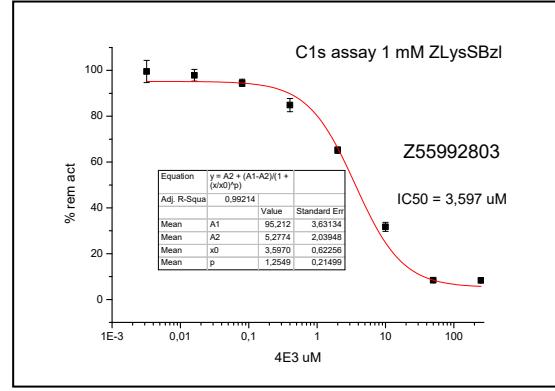

4E3 Z LysSBzl 190807

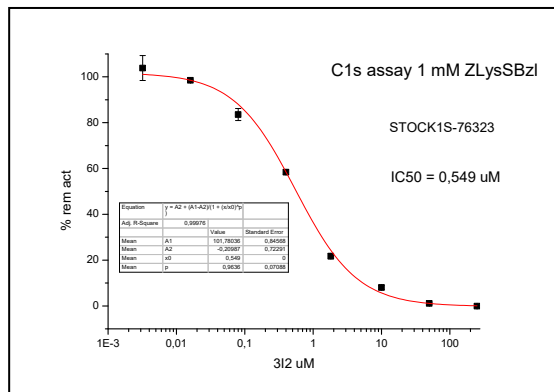

3I2 Z LysSBzl 190807

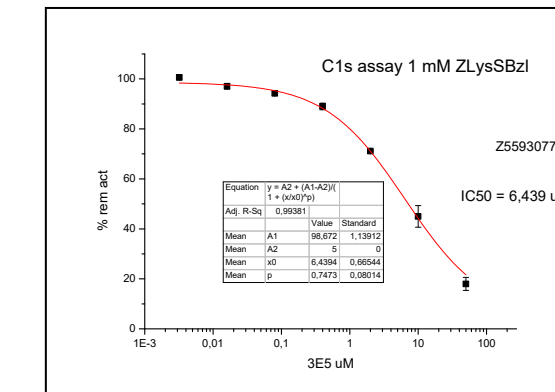

3E5 Z LysSBzl 190807

Fxa assay; IC50 measurements

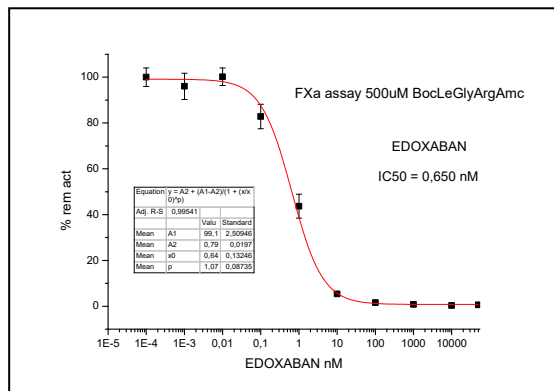

EDOXABAN BocLeuGlyArgAMC 190810

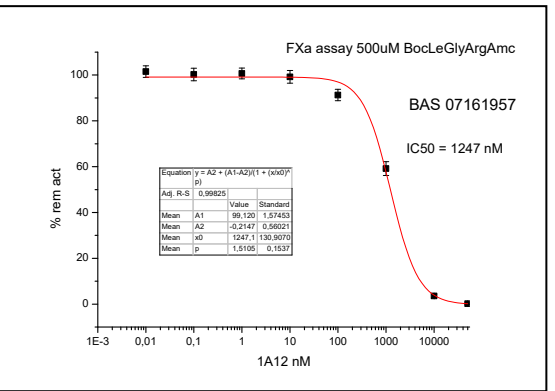

1A12 BocLeuGlyArgAMC 190810

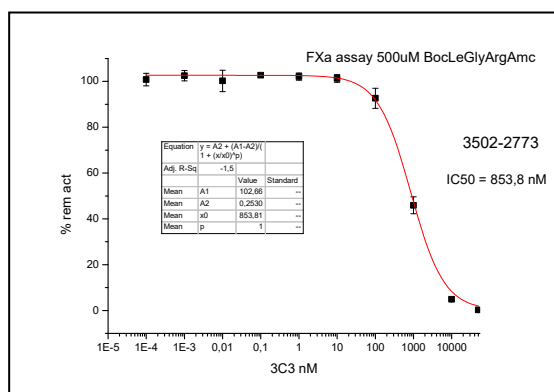

3C3 BocLeuGlyArgAMC 190810

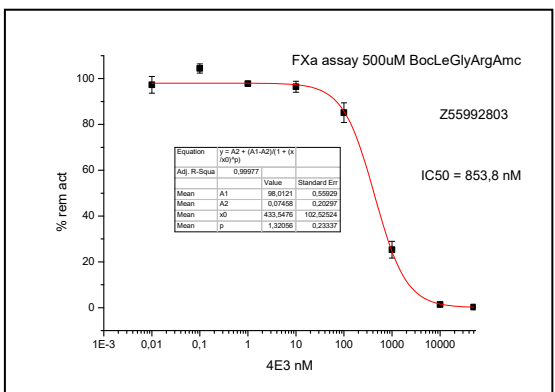

4E3 BocLeuGlyArgAMC 190810

Table S5. Biological data and docking scores of the non-amidine literature inhibitors (Chen *et al.*, 2018 [1]) (full list)

| <b>Compound ID</b> | <b>IC<sub>50</sub> (μM)</b> | <b>Glide docking score</b> |
|--------------------|-----------------------------|----------------------------|
| 17178137           | 11.0                        | -5.538                     |
| 4951143            | 19.1                        | -5.595                     |
| 2986934            | 0.34                        | -6.892                     |
| 710644             | 1.09                        | -6.556                     |
| 5146207            | >50                         | -6.495                     |
| 807111             | >50                         | -5.909                     |
| 1107361            | >50                         | -6.621                     |
| 827004             | 3.04                        | -7.022                     |
| 4957387            | 32.9                        | -6.737                     |
| 898930             | 5.54                        | -6.733                     |
| 17178134           | 23.1                        | -5.801                     |
| 17178138           | 42.6                        | -5.484                     |
| 17131127           | >50                         | -5.420                     |
| 834536             | >50                         | -6.729                     |
| 693001             | >50                         | -6.494                     |
| 792914             | >50                         | -6.012                     |
| 570059             | >50                         | -6.944                     |

Table S6. Pharmacophore based virtual screening of commercial databases

| Total number of structures in the Phase DB | Number of hits with pharmacophore HTS   |                                    |                                          |
|--------------------------------------------|-----------------------------------------|------------------------------------|------------------------------------------|
|                                            | <b>1,2,3-Benzotriazole AARR_3 model</b> | <b>1,2,4-Triazole AHRR_1 model</b> | <b>3,1-Benzoxazin-4-one AARR_3 model</b> |
| 679420 (from 445457)                       | 49164                                   | 65482                              | 21847                                    |

Table S7. Biological data and docking scores of the thiopheneamidine inhibitors (Subasinghe *et al*, 2004 [2])

| <b>Compound ID</b> | <b># in article</b> | <b>K<sub>i</sub> (μM)</b> | <b>Glide docking score</b> |
|--------------------|---------------------|---------------------------|----------------------------|
| CHEMBL321519       | 3                   | >20                       | -8.575                     |
| CHEMBL105102       | 4                   | >20                       | -8.965                     |
| CHEMBL104368       | 5                   | >20                       | -8.323                     |
| CHEMBL441273       | 6                   | 3                         | -9.999                     |
| CHEMBL106071       | 7                   | 6                         | -9.633                     |
| CHEMBL105652       | 8                   | >28                       | -7.914                     |
| CHEMBL103840       | 9                   | 12.5                      | -10.194                    |
| CHEMBL322207       | 10                  | 14.4                      | -9.021                     |
| CHEMBL28875        | 11                  | 0.45                      | -9.242                     |
| CHEMBL29290        | 12                  | 0.49                      | -9.921                     |
| CHEMBL31549        | 13                  | 0.7                       | -9.858                     |
| CHEMBL285818       | 14                  | 1.02                      | -9.805                     |
| CHEMBL28723        | 15                  | 0.87                      | -9.896                     |
| CHEMBL287292       | 16                  | 0.52                      | -9.987                     |
| CHEMBL283859       | 17                  | 4.7                       | -9.931                     |
| CHEMBL29269        | 18                  | 1.06                      | -8.422                     |
| CHEMBL281899       | 19                  | 0.56                      | -10.076                    |
| CHEMBL322672       | 20                  | 3.25                      | -9.750                     |
| CHEMBL102417       | 21                  | 0.46                      | -10.066                    |
| CHEMBL29304        | 22                  | 0.42                      | -9.884                     |
| CHEMBL286243       | 23                  | 0.436                     | -10.201                    |
| CHEMBL418023       | 24                  | 15.400                    | -10.289                    |
| CHEMBL29006        | 25                  | 1.0                       | -10.432                    |
| CHEMBL28618        | 26                  | 0.90                      | -10.067                    |
| CHEMBL283080       | 27                  | 0.85                      | -10.176                    |
| CHEMBL28949        | 28                  | 0.85                      | -9.970                     |
| CHEMBL29205        | 29                  | 0.47                      | -9.762                     |
| CHEMBL286498       | 30                  | 0.96                      | -8.081                     |
| CHEMBL286267       | 31                  | 0.64                      | -9.947                     |
| CHEMBL285142       | 32                  | 3.0                       | -10.035                    |
| CHEMBL413764       | 33                  | 0.86                      | -9.231                     |
| CHEMBL318576       | 46                  | 0.33                      | -9.180                     |
| CHEMBL106388       | 47                  | 0.19                      | -9.636                     |

|                     |           |             |                |
|---------------------|-----------|-------------|----------------|
| CHEMBL322834        | 48        | 0.15        | -10.353        |
| <b>CHEMBL319394</b> | <b>49</b> | <b>0.06</b> | <b>-10.019</b> |
| CHEMBL321341        | 50        | 0.09        | -9.891         |
| CHEMBL101698        | 51        | 1.50        | -10.252        |
| CHEMBL102835        | 52        | 0.53        | -7.223         |
| CHEMBL317917        | 53        | 0.07        | -9.908         |

**References:**

1. Chen, J. J.; Schmucker, L. N.; Visco, D. P., Pharmaceutical Machine Learning: Virtual High-Throughput Screens Identifying Promising and Economical Small Molecule Inhibitors of Complement Factor C1s. *Biomolecules* **2018**, 8, (2).
2. Subasinghe, N. L.; Ali, A.; Illig, C. R.; Rudolph, M. J.; Klein, S.; Khalil, E.; Soll, R. M.; Bone, R. F.; Spurlino, J. C.; DesJarlais, R. L.; Crysler, C. S.; Cummings, M. D.; Morris, P. E.; Kilpatrick, J. M.; Babu, Y. S., A novel series of potent and selective small molecule inhibitors of the complement component C1s. *Bioorg Med Chem Lett* **2004**, 14, (12), 3043-3047.
